# Supplementary material for: Manifestation of strong magnetic and giant Raman anisotropy in single crystals of Cu for H substituted strontium hydroxyapatite
Source: Royal Society of Chemistry journal article supplement (doi:10.1039/c9ce00923j), 2019-01-01
Supplement: c9ce00923j1.pdf [file c9ce00923j1.pdf]

## Electronic supplementary information

Table S1. Crystal structure refinement data.

|                                                                       |                                                                                    |
|-----------------------------------------------------------------------|------------------------------------------------------------------------------------|
| Empirical formula                                                     | $\text{Sr}_5(\text{PO}_4)_3\text{Cu}_{0.476}\text{O}_{0.83}\text{H}_x$ , $x < 0.1$ |
| Formula weight, $\text{g mol}^{-1}$                                   | 766.6                                                                              |
| Temperature, K                                                        | 293                                                                                |
| Wavelength, Å                                                         | 0.71073                                                                            |
| Space group                                                           | $P63/m$ (No. 176)                                                                  |
| $a$ , Å                                                               | 9.7993(4)                                                                          |
| $c$ , Å                                                               | 7.2938(3)                                                                          |
| $V$ , Å <sup>3</sup>                                                  | 606.56(6)                                                                          |
| $Z$                                                                   | 2                                                                                  |
| X-ray density, $\text{g cm}^{-3}$                                     | 4.197                                                                              |
| Absorption coefficient, $\text{mm}^{-1}$                              | 23.118                                                                             |
| $2\theta$ range, deg.                                                 | 3.68 – 32.86                                                                       |
| Limiting indices                                                      | $-14 \leq h \leq 14$ , $-14 \leq k \leq 14$ , $-10 \leq l \leq 10$                 |
| Number of variable parameters                                         | 44                                                                                 |
| Independent reflections                                               | 789                                                                                |
| Independent reflections with $I > 3\sigma(I)$                         | 523                                                                                |
| $R_1$ (all data), $R_1 [I > 3\sigma(I)]^{\text{a)}$                   | 0.054, 0.026                                                                       |
| $wR_1$ (all data), $wR_1 [I > 3\sigma(I)]^{\text{b)}$                 | 0.028, 0.025                                                                       |
| $\Delta F_{\text{max}}$ , $\Delta F_{\text{min}}$ , $\text{e Å}^{-3}$ | 1.49, -1.97                                                                        |

---

$$\text{a) } R_1 = \frac{\sum ||F_o| - |F_c||}{\sum |F_o|} \quad \text{b) } wR_1 = \frac{\sum w(|F_o| - |F_c|)}{\sum w|F_o|}$$

Table S2. Atomic parameters.

| Atom     | Sr(1)       | Sr(2)       | P           | O(1)        | O(2)        | O(3)       | O(4)       | Cu         |
|----------|-------------|-------------|-------------|-------------|-------------|------------|------------|------------|
| Site     | 4f          | 6h          | 6h          | 6h          | 12i         | 6h         | 2a         | 2b         |
| SOF      | 1           | 1           | 1           | 1           | 1           | 1          | 0.83(4)    | 0.476(7)   |
| <i>x</i> | 2/3         | 0.24697(6)  | 0.59937(17) | 0.6654(5)   | 0.7365(4)   | 0.5383(5)  | 0          | 0          |
| <i>y</i> | 1/3         | -0.01423(6) | 0.63235(16) | 0.5183(5)   | 0.0855(4)   | 0.1205(5)  | 0          | 0          |
| <i>z</i> | -0.00016(9) | 1/4         | -1/4        | -1/4        | 0.0783(5)   | 1/4        | 1/4        | 0          |
| $U_{eq}$ | 0.0116(1)   | 0.0128(2)   | 0.0093(4)   | 0.0144(15)  | 0.0194(11)  | 0.0193(16) | 0.030(4)   | 0.0124(7)  |
| $U_{11}$ | 0.0117(2)   | 0.0129(2)   | 0.0101(6)   | 0.0173(218) | 0.0148(13)  | 0.017(2)   | 0.015(3)   | 0.0119(9)  |
| $U_{22}$ | 0.0117(2)   | 0.0087(2)   | 0.0073(5)   | 0.0177(17)  | 0.0170(14)  | 0.0088(17) | 0.015(3)   | 0.0119(9)  |
| $U_{33}$ | 0.0114(3)   | 0.0144(2)   | 0.0122(6)   | 0.021(2)    | 0.0162(16)  | 0.030(3)   | 0.062(8)   | 0.0136(13) |
| $U_{12}$ | 0.0059(1)   | 0.0038(2)   | 0.0056(4)   | 0.0120(15)  | 0.0003(11)  | 0.0054(17) | 0.0074(16) | 0.0059(4)  |
| $U_{13}$ | 0           | 0           | 0           | 0           | 0.0054(11)  | 0          | 0          | 0          |
| $U_{23}$ | 0           | 0           | 0           | 0           | -0.0011(11) | 0          | 0          | 0          |

Table S3. Selected interatomic distances in Å and angles in deg.

|            |           |    |             |          |    |
|------------|-----------|----|-------------|----------|----|
| Sr(1)-O(1) | 2.575(4)  | 3x | P-O(2)      | 1.533(3) | 2x |
| Sr(1)-O(2) | 2.890(5)  | 3x | P-O(3)      | 1.542(6) |    |
| Sr(1)-O(3) | 2.576(4)  | 3x | Cu-O(4)     | 1.8235   | 2x |
| Sr(2)-O(1) | 2.783(5)  |    | Cu-O(3)     | 3.140(5) | 6x |
| Sr(2)-O(2) | 2.522(3)  | 2x | O(1)-P-O(2) | 111.3(2) | 2x |
| Sr(2)-O(2) | 2.693(3)  | 2x | O(1)-P-O(3) | 110.0(3) |    |
| Sr(2)-O(3) | 2.474(5)  |    | O(2)-P-O(3) | 107.2(2) | 2x |
| Sr(2)-O(4) | 2.4927(7) |    | O(2)-P-O(2) | 109.6(2) |    |
| P-O(1)     | 1.546(6)  |    |             |          |    |

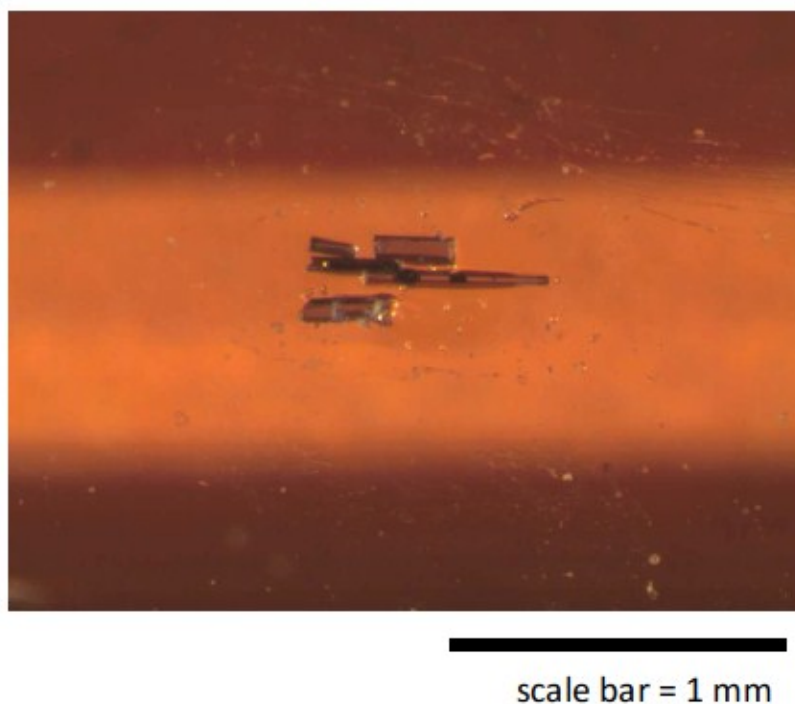

Fig. S1. Optical image of the single crystals of Cu-doped strontium hydroxyapatite fixed on the sample holder parallel to magnetic field.

### Analysis of the anharmonicity of $\nu_1(\text{OCuO})$

The anharmonicity of  $\nu_1(\text{OCuO})$  was analyzed using equation (1) for the vibration energy of a two-atomic molecule with the Morse potential [1].

$$E/hc = \nu_0(n + 1/2) - \nu_0\gamma(n + 1/2)^2, \quad (1)$$

where  $E/hc$  – energy of the vibrational level,  $\nu_0$  – wavenumber of basic harmonic vibration,  $\gamma$  – unharmonicity coefficient,  $n$  – number of the level. The Raman band energy is a difference between  $n = k + 1$  and  $n = 0$  levels, where  $k$  is the overtone number. The dependence of the Raman band position on  $n$  is shown in Fig. S2. The fitting yields  $\nu_0 = 660.6(2) \text{ cm}^{-1}$ ,  $\gamma = 0.00284(5)$ .

For a two-atomic molecule the depth of the energy well  $D_e = hc\nu_0/(4\gamma)$  and dissociation energy  $E_{\text{dis}} = \Delta E - hc\nu$ , where  $\nu$  – wavenumber of basic vibration. For  $[\text{OCuO}]$  this corresponds to breaking of two Cu-O bonds. Taking this into account, the dissociation energy of Cu-O bond in  $[\text{OCuO}]^-$  can be calculated as  $E_d = 1/2E_{\text{dis}} = 346(6) \text{ kJ/mol}$ .

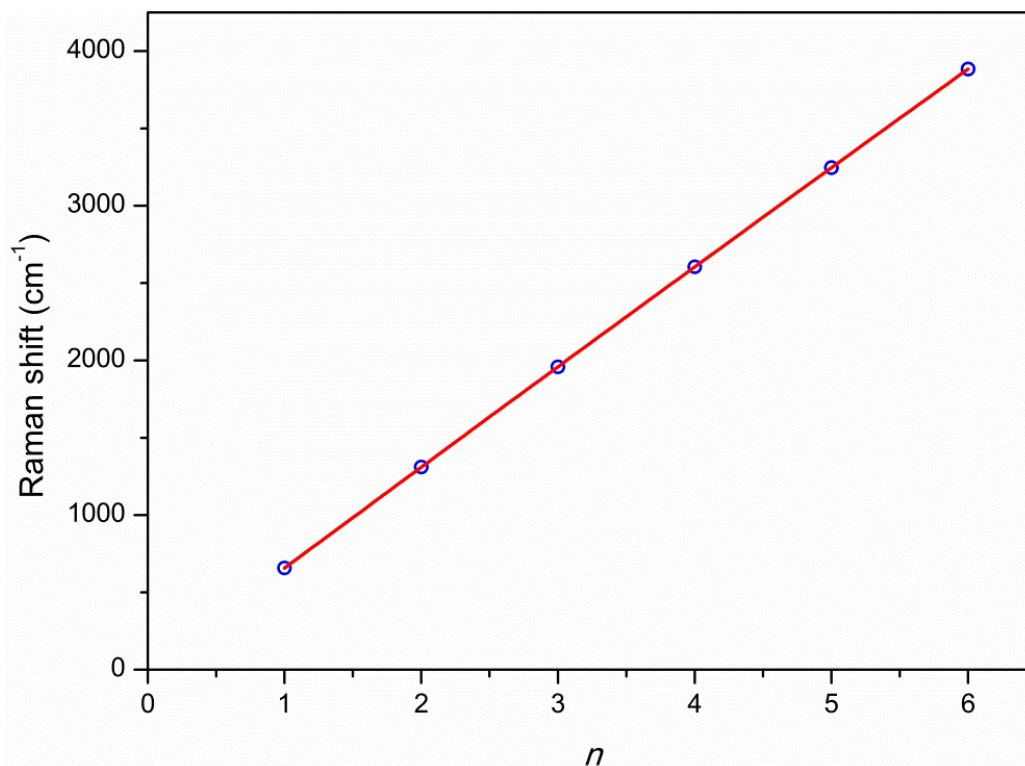

Fig. S2. The dependence of the Raman shift of the  $\nu_1(\text{OCuO})$  basic and overtone bands on the energy level number  $n$ . Circles – experimental points, line – fitting.

## References

1. P. M. Morse, *Phys. Rev.* 1929, **34**, 57-64.
